# Supplementary material
Source: PubMed Central journal article supplement (PMC2254931)
Supplement: plntcell_tpc.107.055178_1.pdf [file plntcell_tpc.107.055178_1.pdf]

Supplemental Data. Nagel et al. (2008). EST analysis of hop (*Humulus lupulus* L.) glandular trichomes identifies an O-methyltransferase that catalyzes the biosynthesis of xanthohumol.

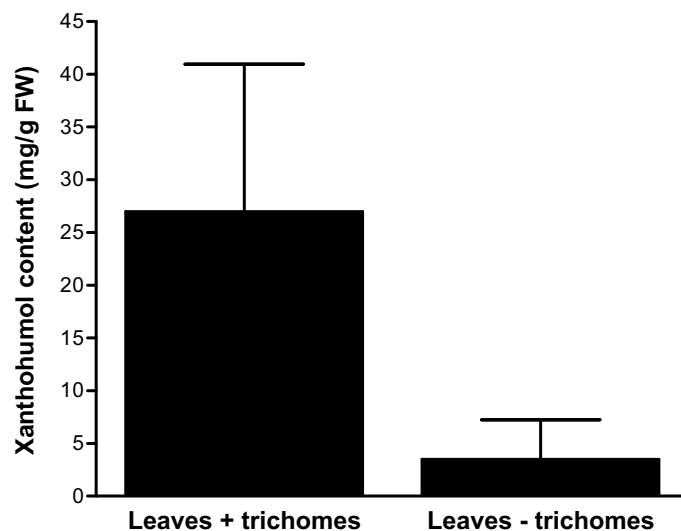

**Supplemental Figure 1.** Xanthohumol levels in leaves with intact glandular trichomes and with trichomes removed. Young leaves were sampled from greenhouse-grown *H. lupulus* 'Taurus' plants and analyzed by HPLC. Trichomes were removed using abrasion. Values represent mean  $\pm$  standard deviation (n=3).

**Supplemental Table 1.** Summary of hop lupulin gland ESTs.

---

|                                                              |                               |             |
|--------------------------------------------------------------|-------------------------------|-------------|
| Number of ESTs for each cDNA Library:                        | HLUPJN1 (Taurus)              | 1 990       |
|                                                              | HLUPLC (Taurus normalized)    | 3 070       |
|                                                              | HLUPTR2CH (Nugget)            | 1 728       |
|                                                              | HLUPTR3CH (Nugget normalized) | 5 280       |
| Total number of ESTs                                         |                               | 12 070      |
| Number of high-quality ESTs <sup>a</sup>                     |                               | 10 581      |
| Average length of high-quality ESTs (bp)                     |                               | 514         |
| Number of contigs                                            |                               | 1 422       |
| Number of singletons                                         |                               | 3 531       |
| Number of putative unique transcripts <sup>b</sup>           |                               | 4 953       |
| Average length of putative unique transcripts (bp)           |                               | 615         |
| Total length of putative unique transcripts (Mbp)            |                               | 3.05        |
| Number of annotated putative unique transcripts <sup>c</sup> |                               | 3 818 (77%) |

---

<sup>a</sup> After removal of vector, low-quality and polyA/T regions, and simple repeats.

<sup>b</sup> Number of unique transcripts is the total number of contigs and singletons.

<sup>c</sup> By blastx comparison to nr protein database (e-value cutoff of  $10^{-5}$ ).

**Supplemental Table 2.** <sup>1</sup>H-NMR spectra of xanthohumol and 4-*O*-methylxanthohumol (δ in ppm, J in Hz)

|                     | Xanthohumol        | 4- <i>O</i> -Methylxanthohumol |
|---------------------|--------------------|--------------------------------|
| H- α                | 7.75, 1H (d, 15.5) | 7.80, 1H (d, 15.6)             |
| H- β                | 7.66, 1H (d, 15.5) | 7.69, 1H (d, 15.6)             |
| H-2, 6              | 7.57, 2H (d, 8.7)  | 7.67, 2H (d, 8.4)              |
| H-3, 5              | 6.83, 2H (d, 8.7)  | 7.01, 2H (d, 8.4)              |
| H-5'                | 6.07, 1H (s)       | 6.07, 1H (s)                   |
| H-1''               | 3.12, 2H (d, 7.1)  | 3.12, 2H (d, 6.9)              |
| H-2''               | 5.12, 1H (t, 7.1)  | 5.12, 1H (t, 6.9)              |
| H-4''               | 1.59, 3H (s)       | 1.59, 3H (s)                   |
| H-5''               | 1.68, 3H (s)       | 1.68, 3H (s)                   |
| 4-OH                | 10.06, 1H (s)      | -                              |
| 2'-OH               | 14.63, 1H (s)      | 14.55, 1H (s)                  |
| 4'-OH               | 10.56, 1H (s)      | 10.62, 1H (s)                  |
| 6'-OCH <sub>3</sub> | 3.85, 3H (s)       | 3.85, 3H (s)                   |
| 4-OCH <sub>3</sub>  | -                  | 3.80, 3H (s)                   |
